# Supplementary material for: The Regulatory Hub of Siderophore Biosynthesis in the Phytopathogenic Fungus Alternaria alternata
Source: J Fungi (Basel). 2023 Mar 29;9(4):427. doi: 10.3390/jof9040427 (PMC10146468; doi:10.3390/jof9040427)
Supplement: Supplementary file 1 [file jof-09-00427-s001.zip › Supplementary_Fig._S1_S13.pdf]

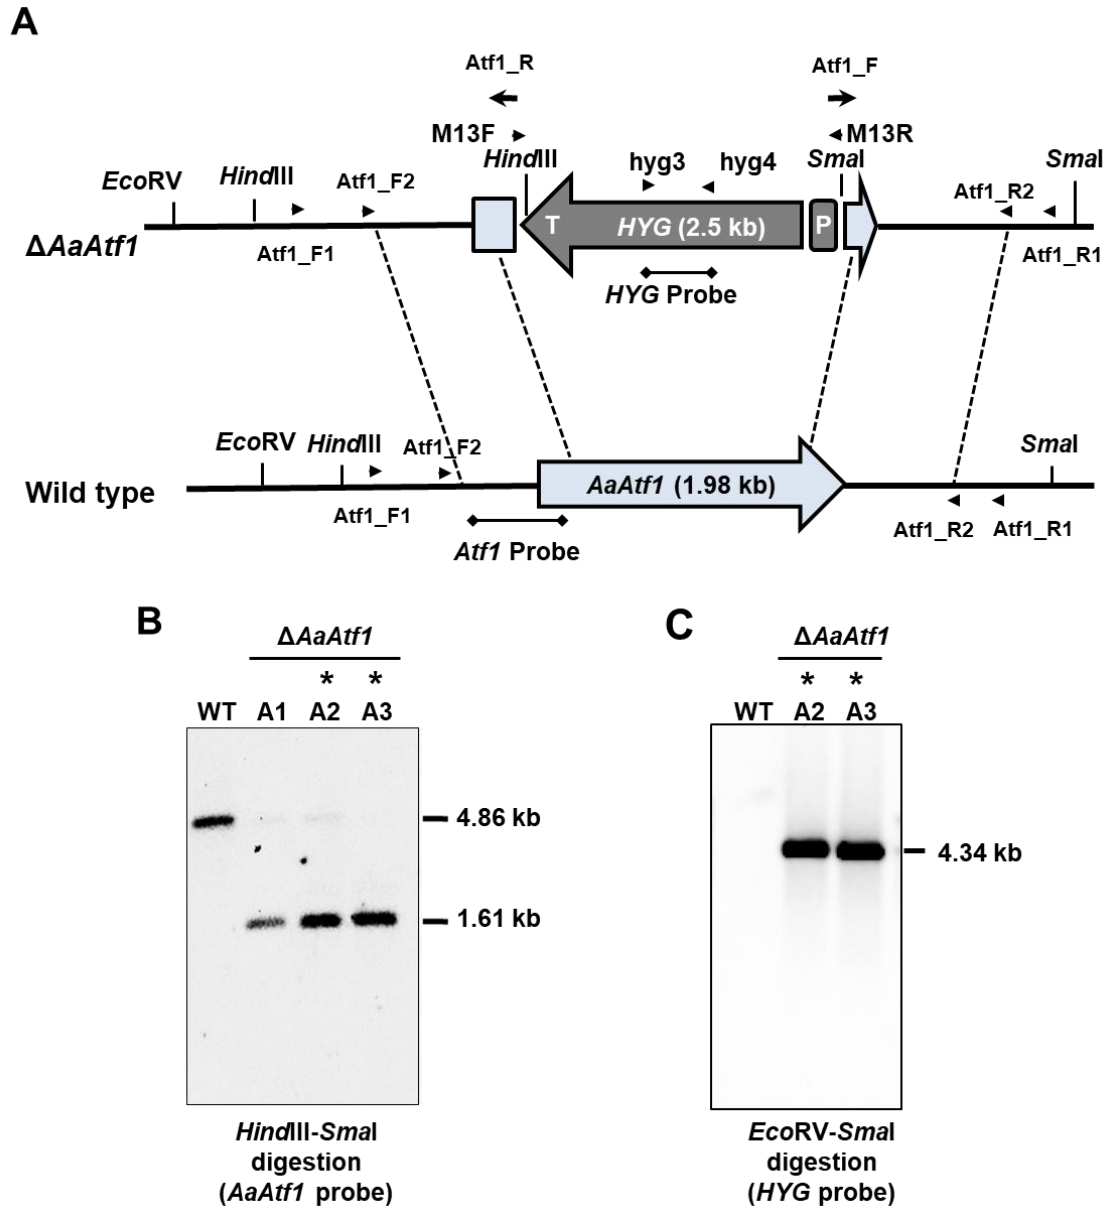

**Figure S1. Deletion of the *AaAtf1* gene using a split marker approach in the tangerine pathotype of *A. alternata*.** (A) Schematic depiction of gene disruption of *AaAtf1* via homologous recombination using truncated but overlapping DNA fragments of a hygromycin phosphotransferase-coding gene (*HYG*) under control by the *Aspergillus nidulans trpC* promoter (P) and terminator (T). Split marker fragments were amplified with the primers as indicated. (B)(C) Southern-blot analysis of genomic DNA prepared from wild-type (WT), three putative *AaAtf1* mutants (A1, A2, and A3). Fungal DNA was cleaved with *HindIII* and *SmaI* (B), or *EcoRV* and *SmaI* (C), electrophoresed, blotted to a nylon membrane and hybridized with an *AaAtf1* (B) or a *HYG* (C) probe. The  $\Delta AaAtf1$  mutants (A2 and A3) used in this research are indicated by asterisks.

**A**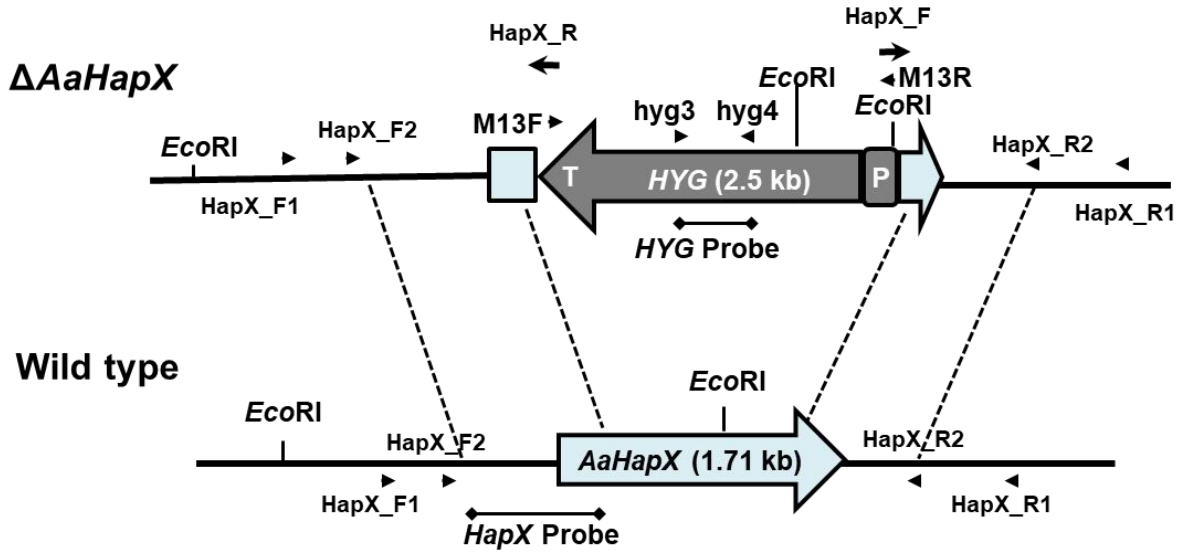**B**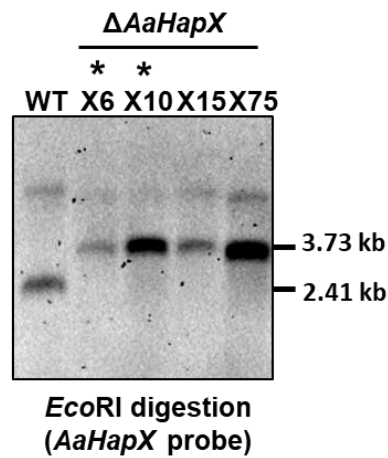**C**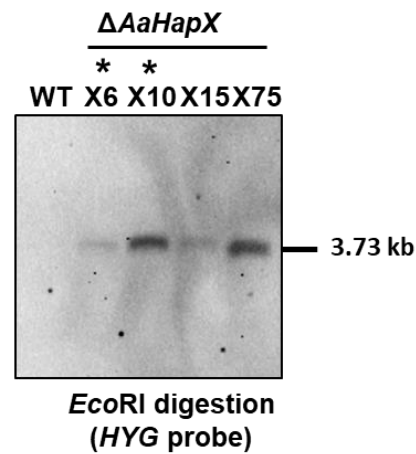

**Figure S2. Deletion of the *AaHapX* gene using a split marker approach in the tangerine pathotype of *A. alternata*.** (A) Schematic depiction of gene disruption of *AaHapX* via homologous recombination using truncated but overlapping DNA fragments of a hygromycin phosphotransferase-coding gene (*HYG*) under control by the *Aspergillus nidulans trpC* promoter (P) and terminator (T). Split marker fragments were amplified with the primers as indicated. (B)(C) Southern-blot analysis of genomic DNA prepared from wild-type (WT) and four putative *ΔAaHapX* mutants (X6, X10, X15, and X75). Fungal DNA was cleaved with *EcoRI*, electrophoresed, blotted to a nylon membrane, and hybridized with an *AaHapX* (B) or a *HYG* (C) probe. The *ΔAaHapX* mutants (X6 and X10) used in this research are indicated by asterisks.

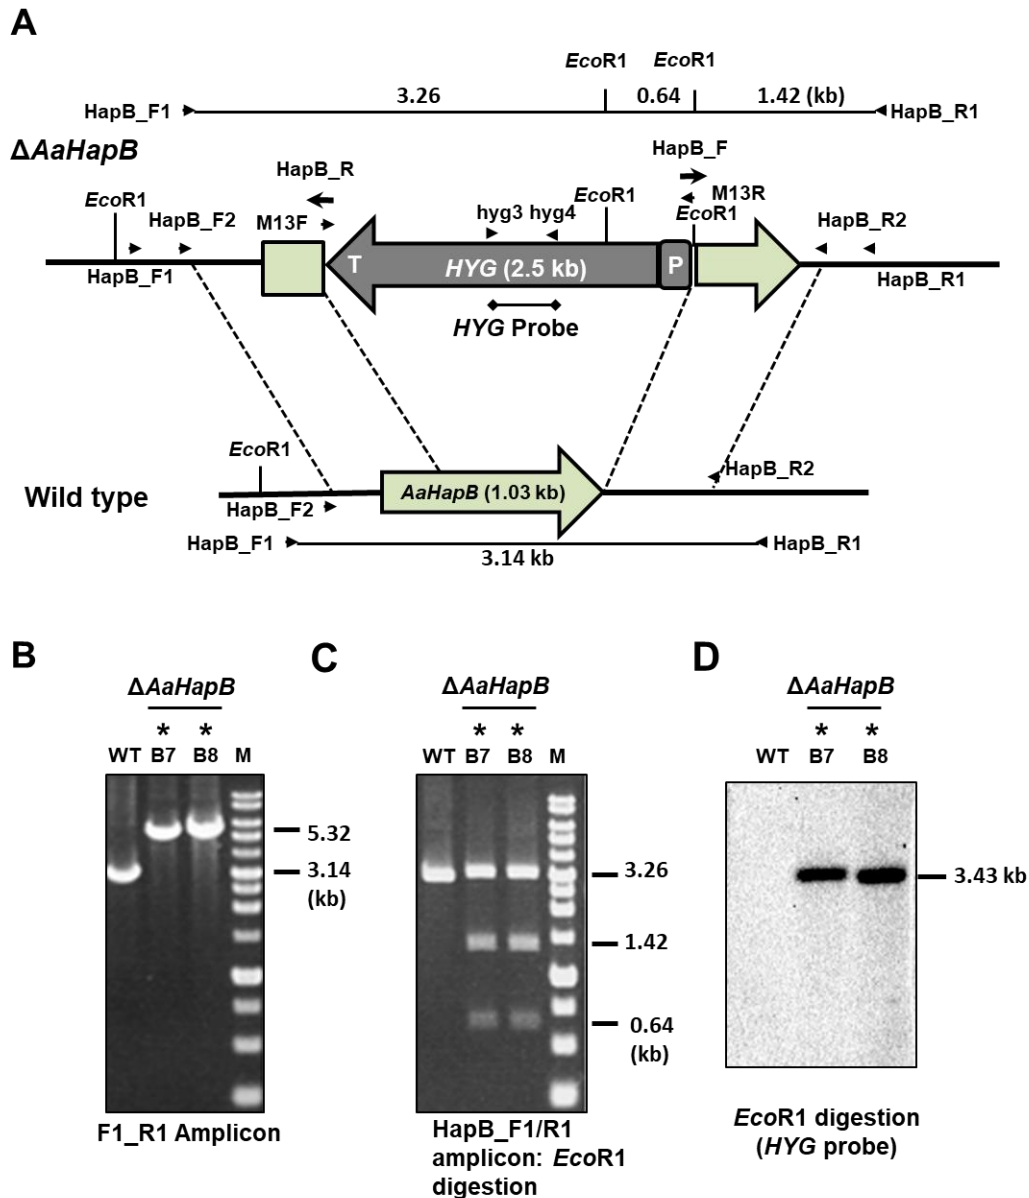

**Figure S3. Deletion of the *AaHapB* gene using a split marker approach in the tangerine pathotype of *A. alternata*.** (A) Schematic depiction of gene disruption of *AaHapB* via homologous recombination using truncated but overlapping DNA fragments of a hygromycin phosphotransferase-coding gene (*HYG*) under control by the *Aspergillus nidulans trpC* promoter (P) and terminator (T). Split marker fragments were amplified with the primers as indicated. (B) Gel image showing DNA fragments amplified from wild-type (WT) and two putative  $\Delta AaHapB$  mutants (B7 and B8) with the primers HapB\_F1/HapB\_R1. (C) Restriction enzyme length polymorphism patterns of the F1/R1 amplicons after *EcoRI* digestion. (D) Southern-blot analysis of genomic DNA prepared from wild-type (WT) and two transformants (B7 and B8). Fungal DNA was cleaved with *EcoRI*, electrophoresed, blotted to a nylon membrane, and hybridized with a *HYG* probe. The  $\Delta AaHapB$  mutants (B7 and B8) used in this research are indicated by asterisks.

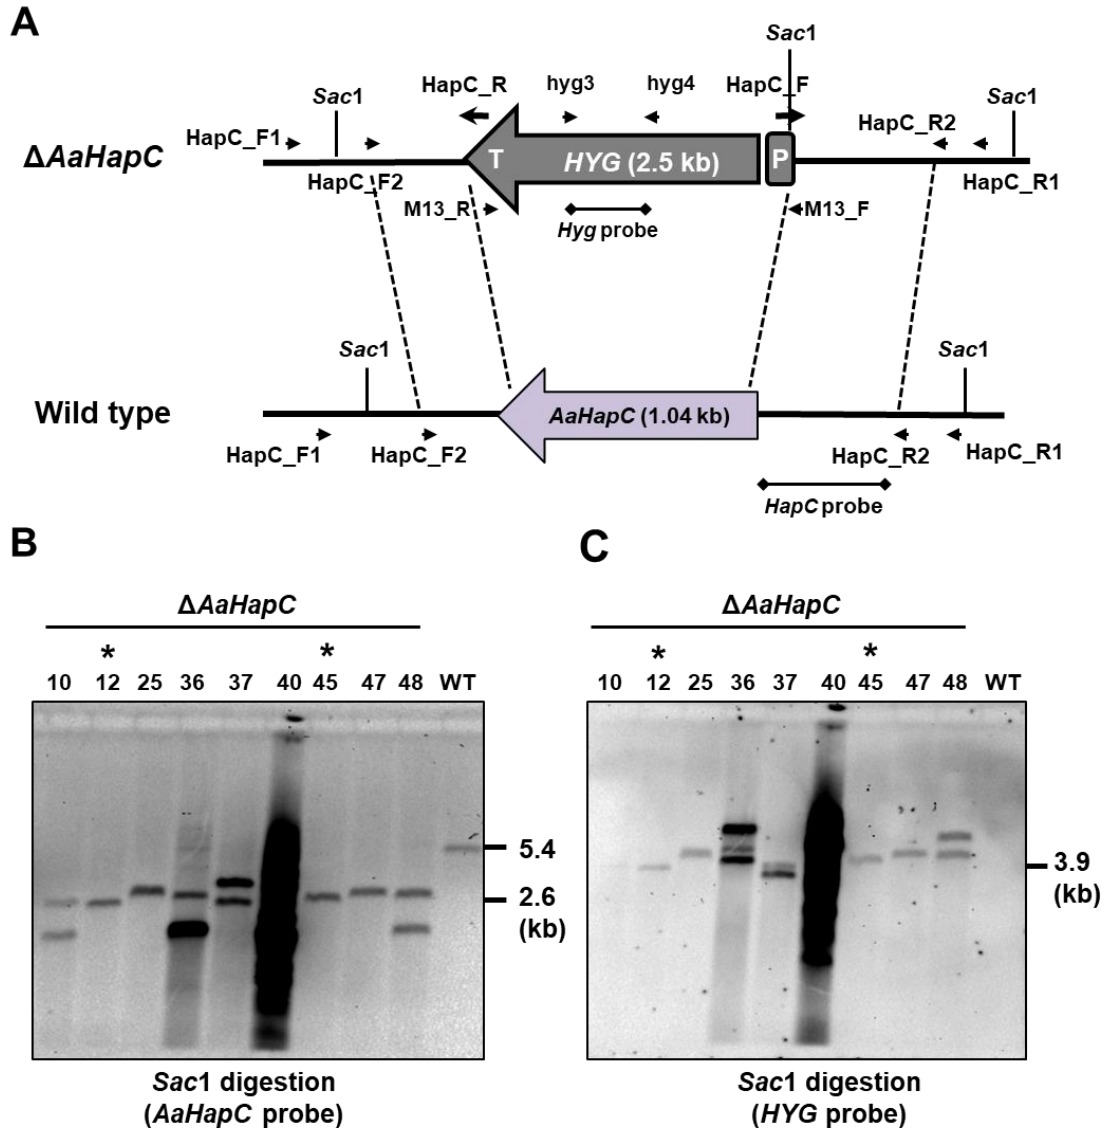

**Figure S4. Deletion of the *AaHapC* gene using a split marker approach in the tangerine pathotype of *A. alternata*.** (A) Schematic depiction of gene disruption of *AaHapC* via homologous recombination using truncated but overlapping DNA fragments of a hygromycin phosphotransferase-coding gene (*HYG*) under control by the *Aspergillus nidulans trpC* promoter and terminator. Split marker fragments were amplified with the primers as indicated. (B)(C) Southern-blot analysis of genomic DNA prepared from wild-type (WT) and nine transformants (10, 12, 25, 36, 37, 40, 45, 47, and 48). Fungal DNA was cleaved with *SacI*, electrophoresed, blotted to a nylon membrane, and hybridized with an *AaHapB* (B) or a *HYG* (C) probe. The  $\Delta AaHapC$  mutants (C12 and C45) used in this research are indicated by asterisks.

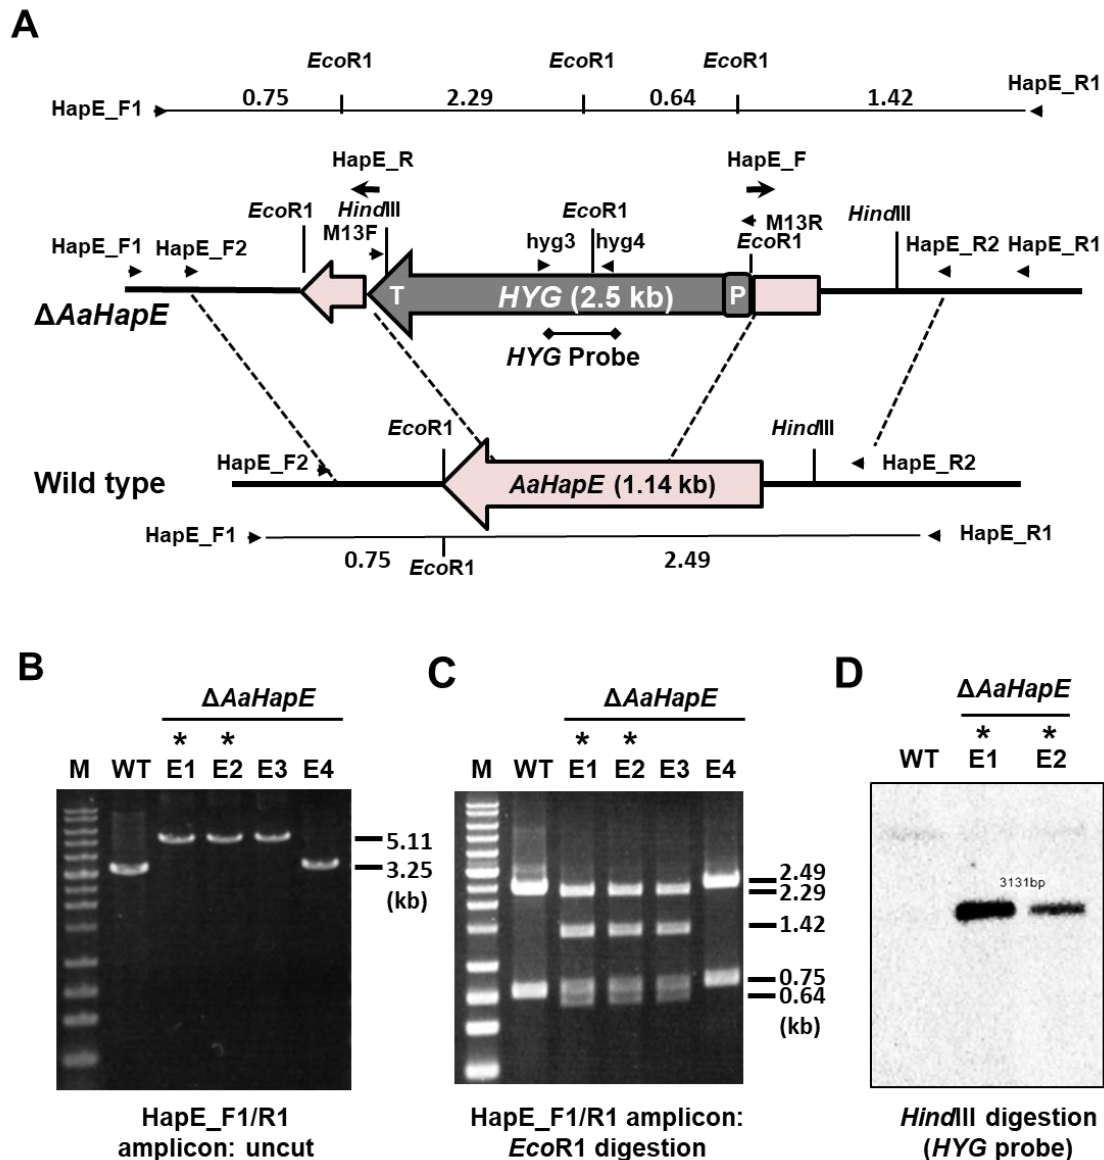

**Figure S5. Deletion of the *AaHapE* gene using a split marker approach in the tangerine pathotype of *A. alternata*.** (A) Schematic depiction of gene disruption of *AaHapE* via homologous recombination using truncated but overlapping DNA fragments of a hygromycin phosphotransferase-coding gene (*HYG*) under control by the *Aspergillus nidulans trpC* promoter (P) and terminator (T). Split marker fragments were amplified with the primers as indicated. (B) Gel image showing DNA fragments amplified from wild-type (WT), four transformants (E1, E2, E3, and E4) with the primers HapE\_F1/HapE\_R1. (C) Restriction enzyme length polymorphism patterns of the F1/R1 amplicons after *EcoR1* digestion. (D) Southern-blot analysis of genomic DNA prepared from wild-type (WT) and two transformants (E1 and E2). Fungal DNA was cleaved with *HindIII*, electrophoresed, blotted to a nylon membrane, and hybridized with a *HYG* probe. The  $\Delta AaHapE$  mutants (E1 and E2) used in this research are indicated by asterisks.

# Atf1

|                                                          | Distance |       |       |       |       |       |       |       |
|----------------------------------------------------------|----------|-------|-------|-------|-------|-------|-------|-------|
|                                                          | 1        | 2     | 3     | 4     | 5     | 6     | 7     | 8     |
| <i>Aspergillus fumigatus</i> Af293                       | 1        | 0.21  | 0.31  | 0.61  | 0.61  | 0.70  | 0.66  | 0.64  |
| <i>Aspergillus niger</i> ATCC 1015                       | 2        | 73.94 | 0.30  | 0.65  | 0.65  | 0.71  | 0.65  | 0.65  |
| <i>Penicillium digitatum</i> PHI26                       | 3        | 62.81 | 65.74 | 0.59  | 0.60  | 0.61  | 0.66  | 0.64  |
| <i>Fusarium oxysporum</i> f. sp. <i>lycopersici</i> 4287 | 4        | 43.31 | 44.54 | 44.17 | 0.07  | 0.36  | 0.70  | 0.68  |
| <i>Fusarium graminearum</i> PH-1                         | 5        | 43.23 | 44.64 | 44.25 | 92.61 | 0.39  | 0.69  | 0.67  |
| <i>Magnaporthe oryzae</i> 70-15                          | 6        | 39.60 | 41.68 | 43.72 | 64.05 | 62.52 | 0.78  | 0.77  |
| <i>Alternaria alternata</i> EV-MIL-31                    | 7        | 40.13 | 41.71 | 39.80 | 41.02 | 41.46 | 37.42 | 0.00  |
| <i>Alternaria alternata</i> SRC1IrK2f                    | 8        | 40.87 | 43.22 | 40.41 | 41.81 | 42.25 | 38.40 | 90.81 |

Identity (%)

## Conserved Motif

- Aft1\_OSA: Aft1 osmotic stress response (OSM) domain
- Aft1\_HRA domain
- Aft1\_HRR domain
- bZIP\_ATF2 domain
- Dimer interface
- Coiled coil DNA binding domain

| Name                                                     | p-value   | Motif Locations |
|----------------------------------------------------------|-----------|-----------------|
| <i>Aspergillus fumigatus</i> Af293                       | 6.08e-231 |                 |
| <i>Aspergillus niger</i> ATCC 1015                       | 1.11e-230 |                 |
| <i>Penicillium digitatum</i> PHI26                       | 4.10e-223 |                 |
| <i>Fusarium oxysporum</i> f. sp. <i>lycopersici</i> 4287 | 7.86e-220 |                 |
| <i>Fusarium graminearum</i> PH-1                         | 1.80e-224 |                 |
| <i>Magnaporthe oryzae</i> 70-15                          | 4.70e-198 |                 |
| <i>Alternaria alternata</i> EV-MIL-31                    | 9.45e-219 |                 |
| <i>Alternaria alternata</i> SRC1IrK2f                    | 8.12e-219 |                 |

**Figure S6. Pairwise comparison and alignment of conserved motifs of the AaAtf1 sequence with fungal Atf1 orthologs.** A pairwise comparison of the sequence was performed using CLC Genomic Workbench 9.5.1 to calculate genetic distance using the jukes-cantor model and percent identity. Conserved domains were predicted by NCBI and the MEME Suite server.

# HapX

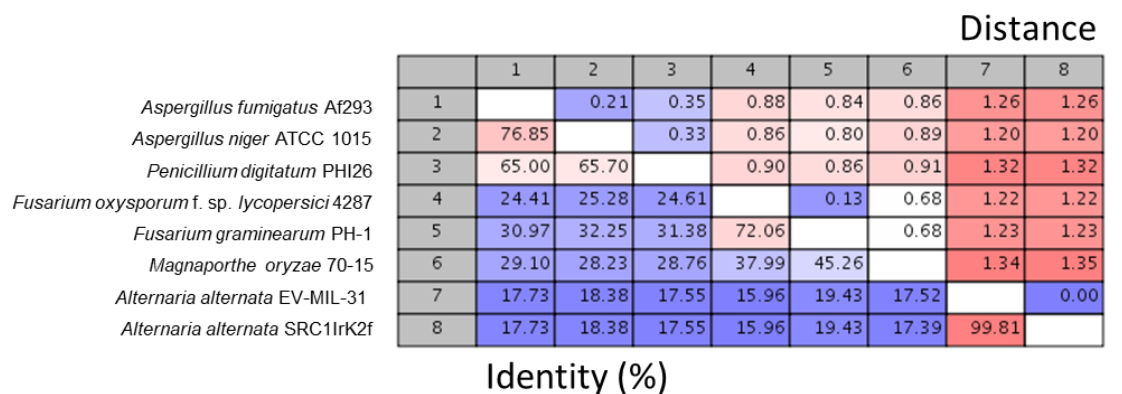

## Conserved Motif

- Hap4-like CCAAT-binding complex binding domain (CBC-BD)
- bZIP\_YAP: Basic leucine zipper (bZIP) domain of Yeast Activated Protein (YAP)
- Coiled coil DNA binding domain
- Dimer interface

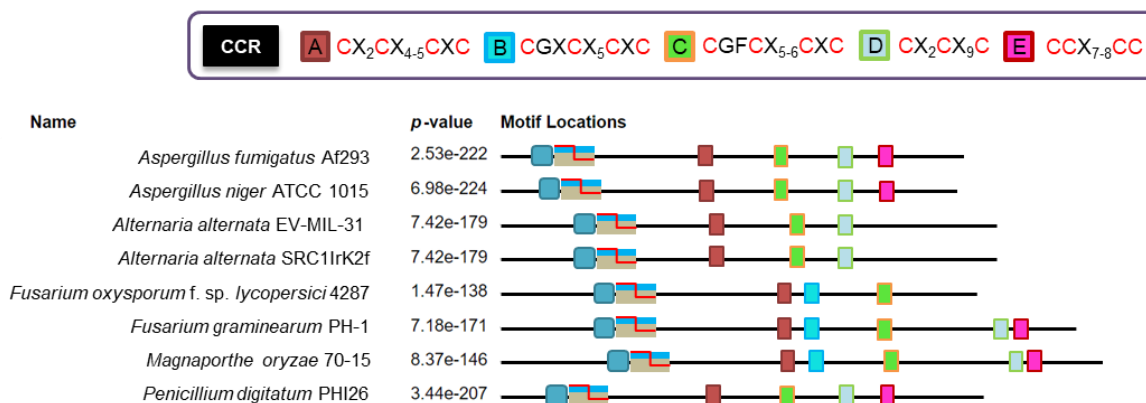

**Figure S7. Pairwise comparison and alignment of conserved motifs of the AaHapX sequence with fungal HapX orthologs.** A pairwise comparison of the sequence was performed using CLC Genomic Workbench 9.5.1 to calculate genetic distance using the jukes-cantor model and percent identity. Conserved domains containing cysteine (C) residues were predicted by NCBI and the MEME Suite server.

# HapB

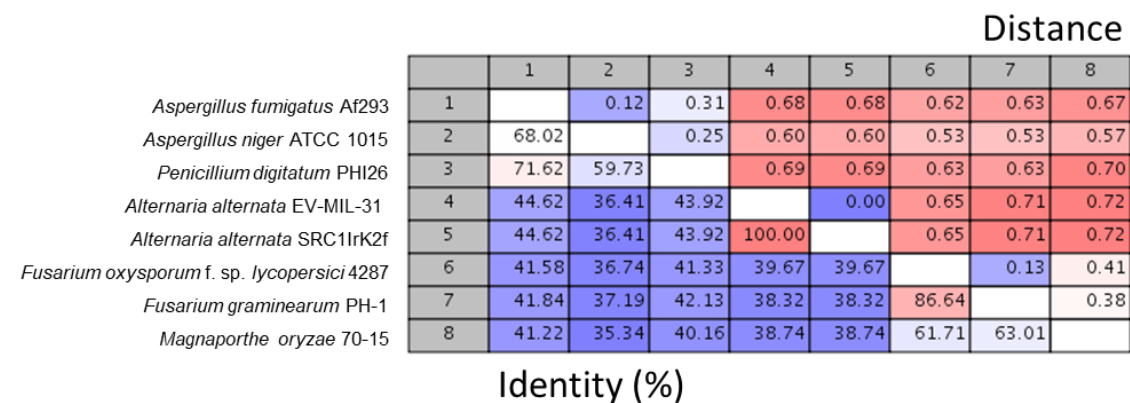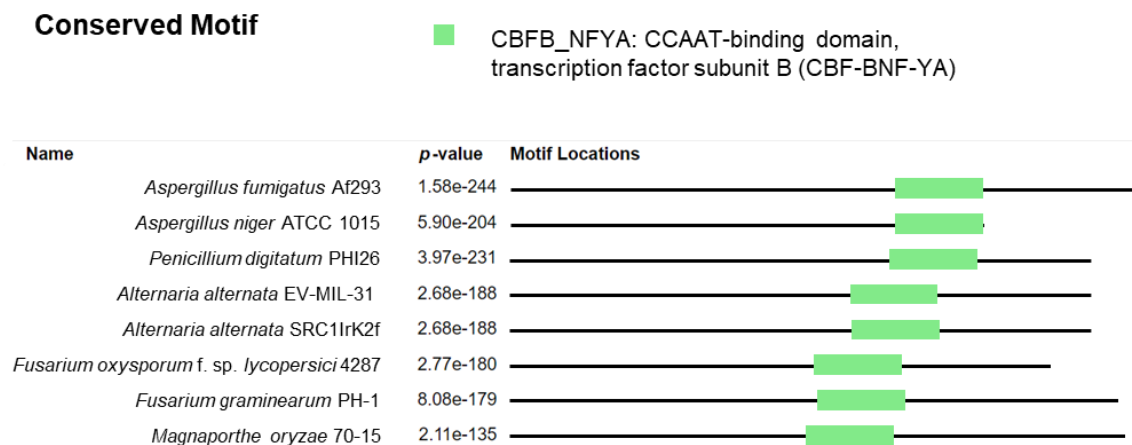

**Figure S8. Pairwise comparison and alignment of conserved motifs of the AaHapB sequence with fungal HapB orthologs.** A pairwise comparison of the sequence was performed using CLC Genomic Workbench 9.5.1 to calculate genetic distance using the jukes-cantor model and percent identity. Conserved domains were predicted by NCBI and the MEME Suite server.

# HapC

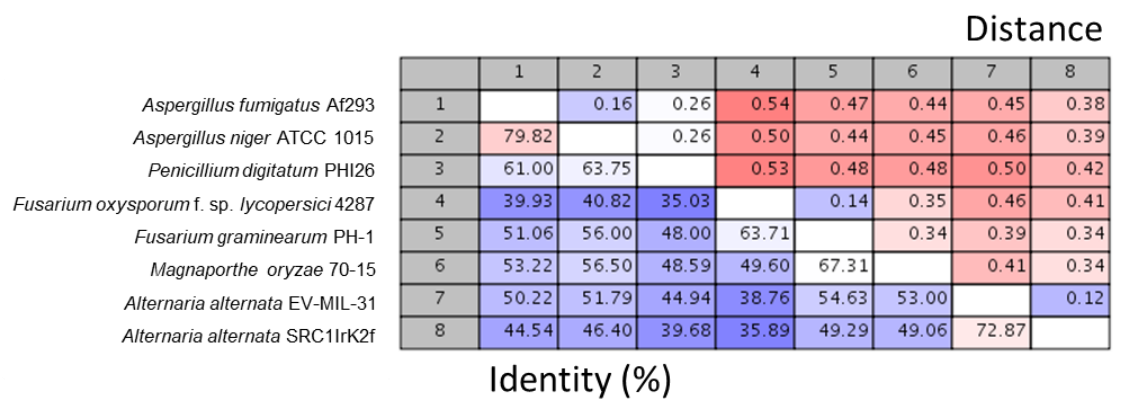

## Conserved Motif

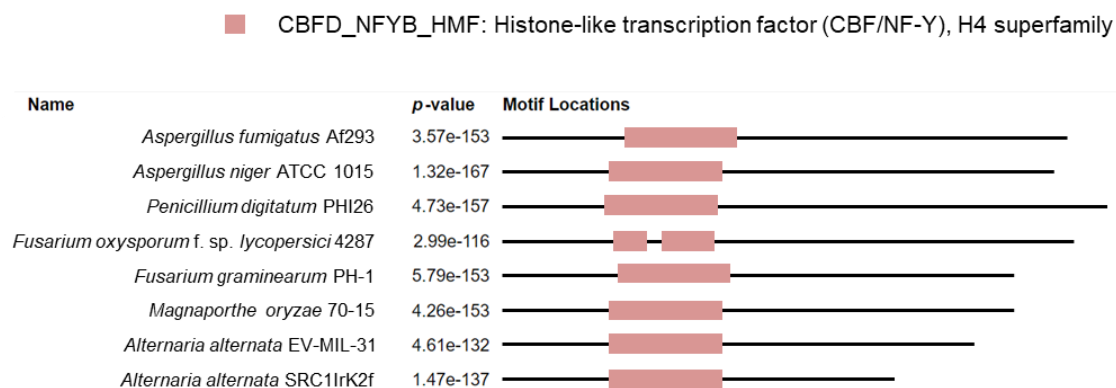

**Figure S9. Pairwise comparison and alignment of conserved motifs of the AaHapC sequence with fungal HapC orthologs.** A pairwise comparison of the sequence was performed using CLC Genomic Workbench 9.5.1 to calculate genetic distance using the jukes-cantor model and percent identity. Conserved domains were predicted by NCBI and the MEME Suite server.

# HapE

|                                                          | Distance |       |       |       |       |       |        |
|----------------------------------------------------------|----------|-------|-------|-------|-------|-------|--------|
|                                                          | 1        | 2     | 3     | 4     | 5     | 6     | 7      |
| <i>Fusarium oxysporum</i> f. sp. <i>lycopersici</i> 4287 | 1        | 0.21  | 0.45  | 0.47  | 0.43  | 0.60  | 0.60   |
| <i>Fusarium graminearum</i> PH-1                         | 2        | 79.14 | 0.37  | 0.44  | 0.41  | 0.54  | 0.54   |
| <i>Magnaporthe oryzae</i> 70-15                          | 3        | 57.89 | 63.29 | 0.46  | 0.49  | 0.54  | 0.54   |
| <i>Aspergillus fumigatus</i> Af293                       | 4        | 56.10 | 57.04 | 57.39 | 0.09  | 0.48  | 0.48   |
| <i>Aspergillus niger</i> ATCC 1015                       | 5        | 57.34 | 57.59 | 56.27 | 86.50 | 0.46  | 0.46   |
| <i>Alternaria alternata</i> EV-MIL-31                    | 6        | 45.79 | 49.22 | 47.98 | 50.46 | 50.62 | 0.00   |
| <i>Alternaria alternata</i> SRC1IrK2f                    | 7        | 45.79 | 49.22 | 47.98 | 50.46 | 50.62 | 100.00 |

Identity (%)

## Conserved Motif

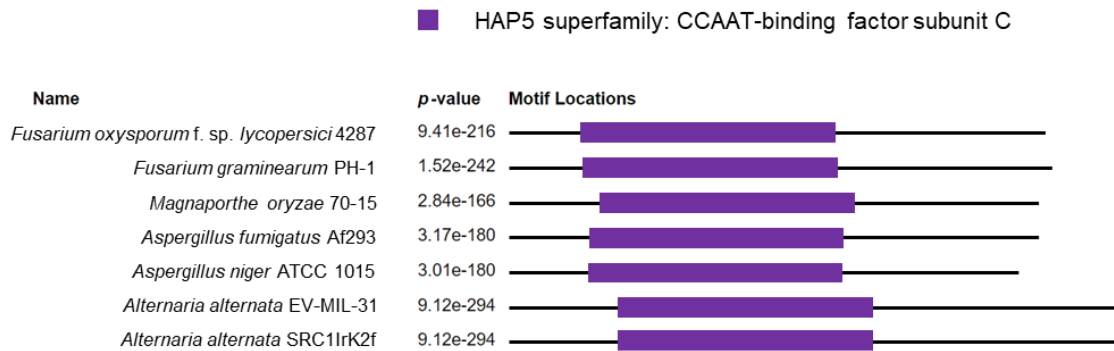

**Figure S10. Pairwise comparison and alignment of conserved motifs of the AaHapE sequence with fungal HapE orthologs.** A pairwise comparison of the sequence was performed using CLC Genomic Workbench 9.5.1 to calculate genetic distance using the jukes-cantor model and percent identity. Conserved domains were predicted by NCBI and the MEME Suite server.

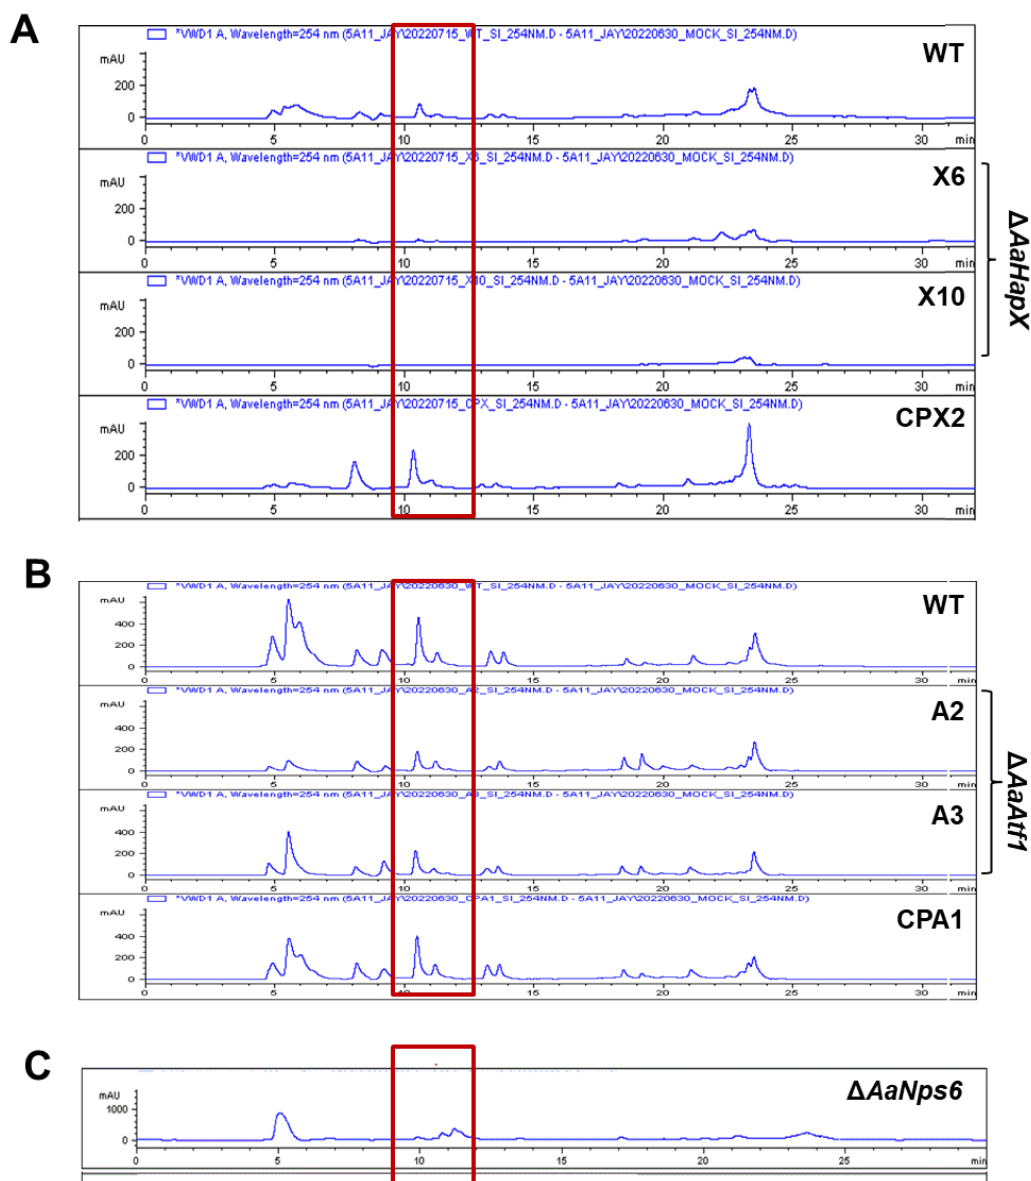

**Figure S11. HPLC analyses of siderophores isolated from the strains of *A. alternata*.** (A) WT: wild type,  $\Delta AaHapX$ : the *AaHapX* deletion mutants (X6 and X10), and CPX2: the *AaHapX* complementation strain. (B)  $\Delta AaAtf1$ : the *AaAtf1* deletion mutants (A2 and A3) and CPA1: the *AaAtf1* complementation strain. (C)  $\Delta AaNps6$ : the *AaNps6* deletion mutant defective for a nonribosomal peptide synthetase involved in the biosynthesis of siderophores. Siderophores (indicated by red rectangle boxes) were separated in a reversed-phase Supelco Ascentis C-18 column (Sigma-Aldrich) using a mobile phase consisting of a linear gradient of 0.2% formic acid in water and 0.2% formic acid in methanol (from 75:25 to 55:45 in 10 min, 25:75 in 5 min, and 0:100 for final 5 min).

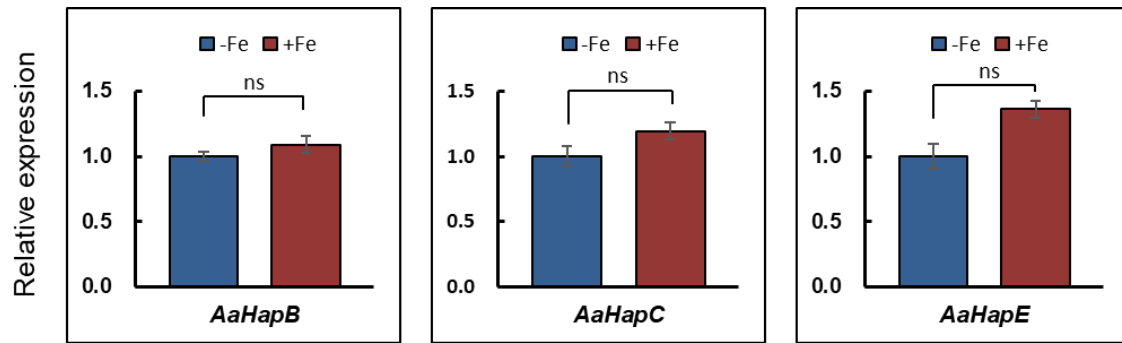

**Figure S12. qRT-PCR analyses.** No significant difference in the expression of *AaHapB*, *AaHapC*, and *AaHapE* in the wild type of *A. alternata* in response to iron. Fungal mycelium grown in PDB for 2 days was harvested, washed with sterile water, shifted to a minimal medium (MM) amended with or without 0.2 mM  $\text{FeCl}_3$ , and incubated for an additional 24 h. The relative expression level from three independent reactions was calculated by a comparative Ct method ( $\Delta\Delta\text{CT}$ ) in relation to the expression of the fungal  $\beta$ -tubulin-coding gene. In each assay, the expression level in the wild type grown in MM was set to 1, and subject to statistical analysis of Student's t-test ( $p < 0.01$ ). All experiments were repeated at least two times, showing similar trends.

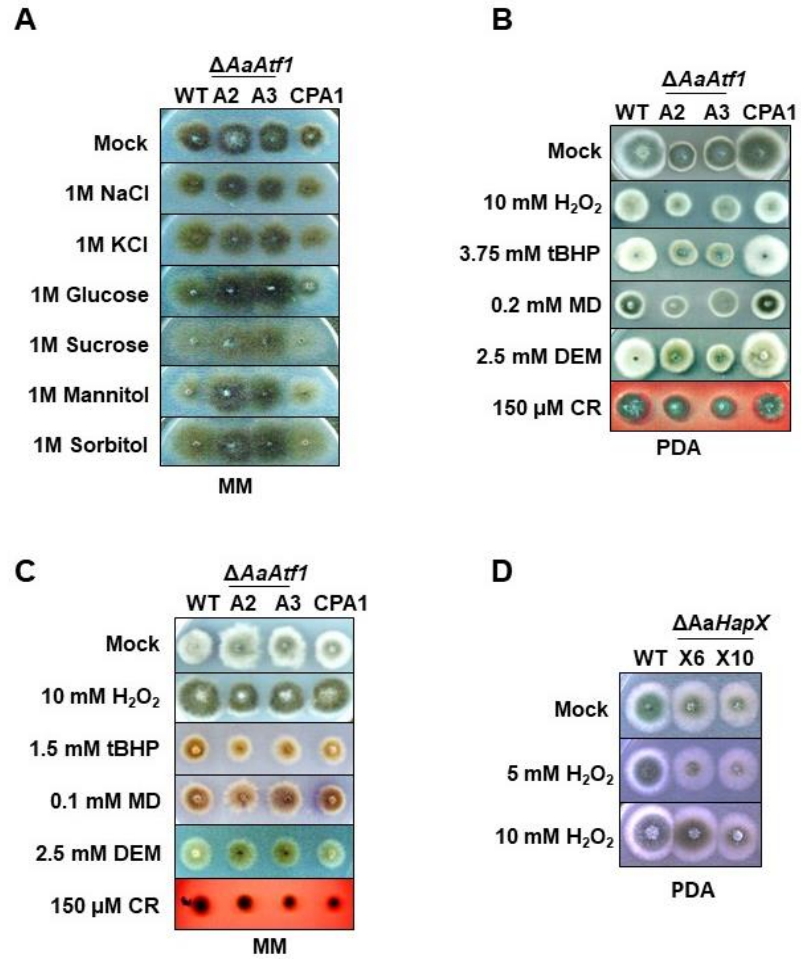

**Figure S13. Sensitivity tests.** Fungal strains were grown on MM or PDA amended with or without a chemical at 28°C for 3 to 7 days. Abbreviations: tBHP, *tert*-butyl-hydroperoxide; MD, menadione; DEM, diethyl maleate; and CR, Congo red.
