# Supplementary material for: The Regulatory Hub of Siderophore Biosynthesis in the Phytopathogenic Fungus Alternaria alternata
Source: J Fungi (Basel). 2023 Mar 29;9(4):427. doi: 10.3390/jof9040427 (PMC10146468; doi:10.3390/jof9040427)
Supplement: Supplementary file 1 [file jof-09-00427-s001.zip › Supplementary_Table_S1.pdf]

Table S1. Oligonucleotide primers

| Name                   | Sequence (5' -> 3')                                                 | Note                                                               |
|------------------------|---------------------------------------------------------------------|--------------------------------------------------------------------|
| <b><u>HYG</u></b>      |                                                                     |                                                                    |
| M13F                   | GCCAGGGTTTTCACGTCACGAC                                              |                                                                    |
| M13R                   | GCGGATAACAATTTCACACAGGA                                             |                                                                    |
| hyg3                   | GGATGCCTCCGCTCGAAGTA                                                |                                                                    |
| hyg4                   | CGTTGCAAGACCTGCCTGAA                                                |                                                                    |
| <b><u>HapX</u></b>     |                                                                     |                                                                    |
| HapX_F1                | GATCAACGCAAAATCAACGCTCGA                                            |                                                                    |
| HapX_F2                | CCAGACGTTTTCTCTCTCACGCTA                                            |                                                                    |
| HapX_R                 | <u>GTCGTGACTGGGAAAAACCTGGCGTGTGCTGTTGGCAGACAAC</u>                  | The underlined region is complementary to M13F sequence            |
| HapX_F                 | <u>TCCTGTGTGAAATTTGTTATCCGCGCATGTACAGTGCATGGAGCTA</u>               | The underlined region is complementary to M13R sequence            |
| HapX_R2                | CGGCATGGTGCTACATTGTCT                                               |                                                                    |
| HapX_R1                | CGTTGGTAGCTCAAGATCGATTGA                                            |                                                                    |
| Comp_HapX_F            | aaa <u>GGA</u> TCC TACTCGGAGCAAGCACTTG                              | The underlined region is the attached <i>Bam</i> HI cutting site   |
| Comp_HapX_R            | ccc <u>AAGCTT</u> ATGGTCAATGGACTGGAC                                | The underlined region is the attached <i>Hind</i> III cutting site |
| <b><u>HapB</u></b>     |                                                                     |                                                                    |
| HapB_F1                | GCAATGACCAATCCACTACTGTGGA                                           |                                                                    |
| HapB_F2                | CACGATCCTCAGCAGTGGGAA                                               |                                                                    |
| HapB_R                 | <u>CTGGGAAAAACCTTGGC</u> AAAACCTGGCGTTCATACCTGCATGAGTCCAGACAC       | The underlined region is complementary to M13F sequence            |
| HapB_F                 | <u>GTCGTGTGAAATTTGTTATCCGCGACACCGACATACGTGGAGAT</u>                 | The underlined region is complementary to M13R sequence            |
| HapB_R2                | CAACACACAGCCCAACCAAGC                                               |                                                                    |
| HapB_R1                | CCACAGACCGTGGAGCAATAGA                                              |                                                                    |
| Comp_HapB_F            | ccc <u>GTCGAC</u> ACCAATCCACTACTGTGGAG                              | The underlined region is the attached <i>Sal</i> I cutting site    |
| Comp_HapB_R            | aaa <u>GCGGCCGC</u> TGCTGCAGACCAACAC                                | The underlined region is the attached <i>Not</i> I cutting site    |
| <b><u>HapC</u></b>     |                                                                     |                                                                    |
| HapC_F1                | GCGGCCGCGCTTACAGAGCATCGGAAGCT                                       |                                                                    |
| HapC_F2                | CTGCCAGATGTATTCCCAAG                                                |                                                                    |
| HapC_R                 | <u>GTCGTGACTGGGAAAAACCTTGGCG</u> GATGTTGAGGTCATATGTCC               | The underlined region is complementary to M13F sequence            |
| HapC_F                 | <u>TCCTGTGTGAAATTTGTTATCCGCGCATGTTCTTCGTCAGGCGAC</u>                | The underlined region is complementary to M13R sequence            |
| HapC_R2                | CATACAGGATCGCCAGCTAG                                                |                                                                    |
| HapC_R1                | GCTGAATGTCATCTGTGGCTGCA                                             |                                                                    |
| <b><u>HapE</u></b>     |                                                                     |                                                                    |
| HapE_F1                | CGCTTCTAGTTTCGTGGGTGCT                                              |                                                                    |
| HapE_F2                | GGACGTGATGTGATGTGGATCTT                                             |                                                                    |
| HapE_R                 | <u>CTGGGAAAAACCTTGGC</u> AAAACCTGGCGTCAATCGTCGGCAGCAGTCG            | The underlined region is complementary to M13F sequence            |
| HapE_F                 | <u>TCCTGTGTGAAATTTGTTATCCGCGTTCGCCCTGCTGGCCATCAT</u>                | The underlined region is complementary to M13R sequence            |
| HapE_R2                | CATCTGAAGTGTGCTGCCCT                                                |                                                                    |
| HapE_R1                | GACAGGGGAAAAGCAGTGGGAA                                              |                                                                    |
| Comp_HapE_F            | ccc <u>GTCGAC</u> TCTGTTGACCCAGGAAG                                 | The underlined region is the attached <i>Sal</i> I cutting site    |
| Comp_HapE_R            | aaa <u>GCGGCCGC</u> TGATTCCGTTGCGCTCAG                              | The underlined region is the attached <i>Not</i> I cutting site    |
| <b><u>AtfI</u></b>     |                                                                     |                                                                    |
| AtfI_F1                | TGGCTTTTGGTCGAGGGCCATC                                              |                                                                    |
| AtfI_F2                | TGGCACCTAGCGGCAGACTTTGATTACG                                        |                                                                    |
| AtfI_R                 | <u>GTCGTGACTGGGAAAAACCTTGGC</u> AAAACCTGGCGTTCGTTTGGGTTGCGGCTGCCATA | The underlined region is complementary to M13F sequence            |
| AtfI_F                 | <u>TCCTGTGTGAAATTTGTTATCCGCGACGCGCGTATCCATCAAAGTAT</u>              | The underlined region is complementary to M13R sequence            |
| AtfI_R2                | GCCAGCCCCATGAATCCCTGCCGTT                                           |                                                                    |
| AtfI_R1                | AACCAACCACTCCCTGCGCATG                                              |                                                                    |
| Comp_Atfl_F            | rcs <u>GAA</u> TTT AGGGGACCATTGAGTACTCTTGGAG                        | The underlined region is the attached <i>Eco</i> RI cutting site   |
| Comp_Atfl_R            | rcs <u>GGA</u> TCC TCAGGAGGAGGGGGAGGAATTGC                          | The underlined region is the attached <i>Bam</i> HI 1 cutting site |
| <b><u>O-RT-PCR</u></b> |                                                                     |                                                                    |
| Tub_qF                 | TTCTGTCGGTAACCTCCATCCATC                                            | <i>β-tubulin</i>                                                   |
| Tub_qR                 | ACTCAGCCTCAGTGAACCTCCATCTC                                          |                                                                    |
| SreA_qF                | CTGGTGGAGGGCGATGTA                                                  | <i>SreA</i>                                                        |
| SreA_qR                | GAACGCTGGACAGCCACT                                                  |                                                                    |
| HapX_qF                | CGATATGGACTGGCGTCAAC                                                | <i>HapX</i>                                                        |
| HapX_qR                | GCTTGCACTAGCTCCATCG                                                 |                                                                    |
| HapB_qF                | GATGCGATGGAACGTGTT                                                  | <i>HapB</i>                                                        |
| HapB_qR                | CCTCCAATGACCCAGCAA                                                  |                                                                    |
| HapC_qF                | CGATACCTGGATAGGTAGA                                                 | <i>HapC</i>                                                        |
| HapC_qR                | TGGCGAGGACATTCTGTTT                                                 |                                                                    |
| HapE_qF                | TCTCCTCTGCATGAATCC                                                  | <i>HapE</i>                                                        |
| HapE_qR                | GACCCAGAAGTAAAGATGA                                                 |                                                                    |
| AtfI_qF                | CGCAAGATGACCGATGAGGA                                                | <i>AtfI</i>                                                        |
| AtfI_qR                | GGCACTTGAGAGCAGCGA                                                  |                                                                    |
| NPS6_qF                | TCGCAACTATTATCCGTGGAG                                               | <i>NPS6</i>                                                        |
| NPS6_qR                | CTGGATGGCCCATATACAATG                                               |                                                                    |
| MirB_qF                | CCTCTCTCCCTACGTACCA                                                 | <i>MirB</i>                                                        |
| MirB_qR                | ACGGTAGTCAAAGCGGTACG                                                |                                                                    |
| Sit1_qF                | CGGTATGATTGTCTGCCACA                                                | <i>Sit1</i>                                                        |
| Sit1_qR                | ACAGGCATCTACCTCGCTAC                                                |                                                                    |
